# Supplementary material
Source: publisher figshare collection journal article supplement (https://acs.figshare.com/ndownloader/files/4645048)
Supplement: Supplementary file 1 [file 4645048]

**A combined ligand field and density functional theory  
analysis of the magnetic anisotropy in oligonuclear  
complexes based on Fe<sup>III</sup>-CN-M<sup>II</sup> exchange-coupled pairs**

*Mihail Atanasov, Peter Comba and Claude A. Daul*

Supplementary Material

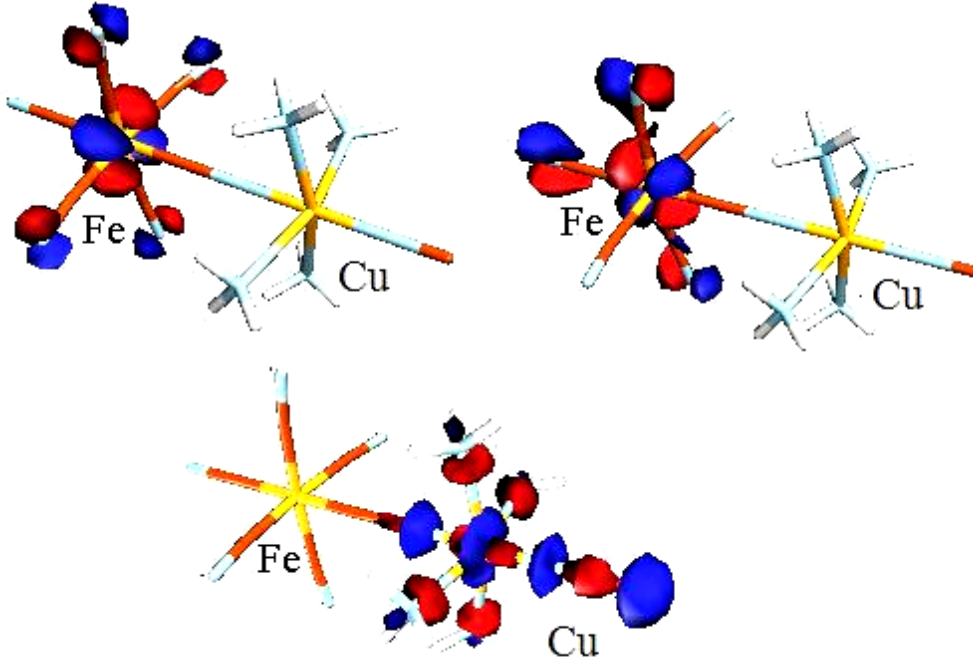

Figure S.1 The magnetic orbitals in the  ${}^2\text{B}_1$  ( $\text{e}^4\text{b}_2^1$ ) and  ${}^2\text{E}$  ( $\text{e}^3\text{b}_2^2$ ) states of  $[\text{Fe}(\text{CN})_6]^{3-}$  (top), and of the  ${}^2\text{A}_1$  ( $\text{d}_{z^2}$ ) ground state of  $[\text{Cu}(\text{NH}_3)_4\text{NC}]^{1+}$  (bottom) from broken symmetry DFT calculations using a B1LYP functional.

#### *Full Derivation of the Hamiltonian of the $\text{Fe}^{\text{III}}$ -CN- $\text{Cu}^{\text{II}}$ Pair*

The matrix of exchange Hamiltonian  $-J_{ij}\hat{\mathbf{s}}_i\hat{\mathbf{s}}_j$ , with  $i$  and  $j$  denoting the magnetic orbitals on center 1 and 2, within the spin only basis  $\alpha_i\alpha_j$ ,  $\beta_i\alpha_j$ ,  $\alpha_i\beta_j$  and  $\beta_i\beta_j$  is given by:

$$\mathbf{H}_{\text{exc}}(i, j) = \begin{matrix} & \begin{matrix} \alpha_i\alpha_j & \beta_i\alpha_j & \alpha_i\beta_j & \beta_i\beta_j \end{matrix} \\ \begin{bmatrix} -\frac{1}{4}J_{ij} & 0 & 0 & 0 \\ 0 & \frac{1}{4}J_{ij} & -\frac{1}{2}J_{ij} & 0 \\ 0 & -\frac{1}{2}J_{ij} & \frac{1}{4}J_{ij} & 0 \\ 0 & 0 & 0 & -\frac{1}{4}J_{ij} \end{bmatrix} & \end{matrix} \quad (\text{S.1})$$

The operator  $\hat{H}_{so} = \zeta_1\hat{\mathbf{l}}_1\hat{\mathbf{s}}_1$  of the spin-orbit coupling interaction of  $[\text{Fe}(\text{CN})_6]^{3-}$  is represented within the  $\text{t}_{2g}$   $(\xi, \eta, \zeta)\alpha$  and  $(\xi, \eta, \zeta)\beta$  spin-orbital basis as follows (the spin-orbit coupling constant  $\zeta$  is defined as positive for  $\text{Fe}^{\text{III}}$ ):

$$\mathbf{H}_{\text{so}} = \begin{matrix} & \begin{matrix} \xi\alpha_1 & \eta\alpha_1 & \zeta\alpha_1 & \xi\beta_1 & \eta\beta_1 & \zeta\beta_1 \end{matrix} \\ \begin{matrix} \left[ \begin{array}{cccccc} 0 & -\frac{i}{2}\zeta & 0 & 0 & 0 & \frac{1}{2}\zeta \\ \frac{i}{2}\zeta & 0 & 0 & 0 & 0 & -\frac{i}{2}\zeta \\ 0 & 0 & 0 & -\frac{1}{2}\zeta & \frac{i}{2}\zeta & 0 \\ 0 & 0 & -\frac{1}{2}\zeta & 0 & \frac{i}{2}\zeta & 0 \\ 0 & 0 & -\frac{i}{2}\zeta & -\frac{i}{2}\zeta & 0 & 0 \\ \frac{1}{2}\zeta & \frac{i}{2}\zeta & 0 & 0 & 0 & 0 \end{array} \right] \end{matrix} & \end{matrix} \quad (\text{S.2})$$

Combining eqs S1, S2 with the Jahn-Teller Hamiltonian (eq.3), we arrive at the total Hamiltonian (S.3), represented by the product of the spin-orbit basis of  $\text{Fe}^{\text{III}}$  and the spin-only basis of  $\text{Cu}^{\text{II}}$   $\alpha', \beta'$ :

$$[(\xi, \eta, \zeta)\alpha_1 ; (\xi, \eta, \zeta)\beta_1] \alpha' \quad \text{and} \quad [(\xi, \eta, \zeta)\alpha_1 ; (\xi, \eta, \zeta)\beta_1] \beta':$$

$$\mathbf{H} = \begin{matrix} & \begin{matrix} (\xi, \alpha_1) \alpha' & (\eta \alpha_1) \alpha' & (\zeta \alpha_1) \alpha' & (\xi, \beta_1) \alpha' & (\eta \beta_1) \alpha' & (\zeta \beta_1) \alpha' & (\xi, \alpha_1) \beta' & (\eta \alpha_1) \beta' & (\zeta \alpha_1) \beta' & (\xi, \beta_1) \beta' & (\eta \beta_1) \beta' & (\zeta \beta_1) \beta' \end{matrix} \\ \begin{matrix} 0 \\ 0 \\ 0 \\ 0 \\ 0 \\ 0 \\ 0 \\ 0 \\ 0 \\ 0 \\ 0 \\ 0 \end{matrix} & \begin{bmatrix} -\frac{J(^2E)}{4} & -\frac{i}{2}\varsigma - V_\tau Q_\varsigma & -V_\tau Q_\eta & 0 & 0 & \frac{1}{2}\varsigma & 0 & 0 & 0 & 0 & 0 & 0 & 0 \\ \frac{i}{2}\varsigma - V_\tau Q_\varsigma & -\frac{J(^2E)}{4} & -V_\tau Q_\xi & 0 & 0 & -\frac{i}{2}\varsigma & 0 & 0 & 0 & 0 & 0 & 0 & 0 \\ -V_\tau Q_\eta & -V_\tau Q_\xi & -\frac{J(^2B_2)}{4} & -\frac{1}{2}\varsigma & \frac{i}{2}\varsigma & 0 & 0 & 0 & 0 & 0 & 0 & 0 & 0 \\ 0 & 0 & -\frac{1}{2}\varsigma & \frac{J(^2E)}{4} & \frac{i}{2}\varsigma - V_\tau Q_\varsigma & -V_\tau Q_\eta & -\frac{J(^2E)}{2} & 0 & 0 & 0 & 0 & 0 & 0 \\ 0 & 0 & -\frac{i}{2}\varsigma & -\frac{i}{2}\varsigma - V_\tau Q_\varsigma & \frac{J(^2E)}{4} & -V_\tau Q_\xi & 0 & -\frac{J(^2E)}{2} & 0 & 0 & 0 & 0 & 0 \\ \frac{1}{2}\varsigma & \frac{i}{2}\varsigma & 0 & -V_\tau Q_\eta & -V_\tau Q_\xi & \frac{J(^2B_2)}{4} & 0 & 0 & -\frac{J(^2B_2)}{2} & 0 & 0 & 0 & 0 \\ 0 & 0 & 0 & -\frac{J(^2E)}{2} & 0 & 0 & \frac{J(^2E)}{4} & -\frac{i}{2}\varsigma - V_\tau Q_\varsigma & -V_\tau Q_\eta & 0 & 0 & 0 & \frac{1}{2}\varsigma \\ 0 & 0 & 0 & 0 & -\frac{J(^2E)}{2} & 0 & \frac{i}{2}\varsigma - V_\tau Q_\varsigma & \frac{J(^2E)}{4} & -V_\tau Q_\xi & 0 & 0 & 0 & -\frac{i}{2}\varsigma \\ 0 & 0 & 0 & 0 & 0 & -\frac{J(^2B_2)}{2} & -V_\tau Q_\eta & -V_\tau Q_\xi & \frac{J(^2B_2)}{4} & -\frac{1}{2}\varsigma & \frac{i}{2}\varsigma & 0 & 0 \\ 0 & 0 & 0 & 0 & 0 & 0 & 0 & 0 & -\frac{1}{2}\varsigma & -\frac{J(^2E)}{4} & \frac{i}{2}\varsigma - V_\tau Q_\varsigma & -V_\tau Q_\eta & -V_\tau Q_\eta \\ 0 & 0 & 0 & 0 & 0 & 0 & 0 & 0 & -\frac{i}{2}\varsigma & -\frac{i}{2}\varsigma - V_\tau Q_\varsigma & -\frac{J(^2E)}{4} & -V_\tau Q_\xi & -V_\tau Q_\xi \\ 0 & 0 & 0 & 0 & 0 & 0 & \frac{1}{2}\varsigma & \frac{i}{2}\varsigma & 0 & -V_\tau Q_\eta & -V_\tau Q_\xi & -\frac{J(^2B_2)}{4} & -\frac{J(^2B_2)}{4} \end{bmatrix} \end{matrix}$$

(S.3)

We now focus on the particular case of a  $\text{Fe}^{\text{III}}\text{-CN-Cu}^{\text{II}}$  pair of  $C_{4v}$  symmetry with no Jahn-Teller distortions on  $[\text{Fe}(\text{CN})_6]^{3-}$ . We make use of the eigenfunctions of  $\mathbf{H}_{\text{SO}}$  in the form given in reference<sup>90</sup> of the manuscript.  $E''(\alpha'', \beta'')$  and  $U'(\mu, \nu, \kappa, \lambda)$ , defined by the column vectors  $\mathbf{c}(i)$  ( $i = \alpha'', \beta'', \mu, \nu, \kappa, \lambda$ ), lead to the following matrix, which transforms  $\mathbf{H}_{\text{SO}}$  (eq.S.2) into this basis:

$$[\mathbf{c}(\alpha'') \quad \mathbf{c}(\beta'') \quad \mathbf{c}(\mu) \quad \mathbf{c}(\nu) \quad \mathbf{c}(\kappa) \quad \mathbf{c}(\lambda)] =$$

$$= \mathbf{T} = \begin{bmatrix} 0 & \frac{i}{\sqrt{3}} & -\frac{i}{\sqrt{2}} & 0 & -\frac{i}{\sqrt{6}} & 0 \\ 0 & \frac{1}{\sqrt{3}} & \frac{1}{\sqrt{2}} & 0 & -\frac{1}{\sqrt{6}} & 0 \\ \frac{i}{\sqrt{3}} & 0 & 0 & -i\sqrt{\frac{2}{3}} & 0 & 0 \\ \frac{i}{\sqrt{3}} & 0 & 0 & \frac{i}{\sqrt{6}} & 0 & \frac{i}{\sqrt{2}} \\ -\frac{1}{\sqrt{3}} & 0 & 0 & -\frac{1}{\sqrt{6}} & 0 & \frac{1}{\sqrt{2}} \\ 0 & -\frac{i}{\sqrt{3}} & 0 & 0 & -i\sqrt{\frac{2}{3}} & 0 \end{bmatrix} \quad (\text{S.4})$$

The transformed matrix  $\mathbf{T}'\mathbf{H}_{\text{SO}}\mathbf{T}$  is diagonal with eigenvalues  $-\zeta[E''(\alpha'', \beta'')]$  and  $\zeta/2[U'(\mu, \nu, \kappa, \lambda)]$  and with a Zeeman Hamiltonian in the z direction [i.e.  $\hat{H}_{z2} = \mu_B(\mathbf{s}_{z1} + k\mathbf{l}_{1z})B_z$ ], given by (S.5) and with an effective  $M_s'$  value of each of the components of  $E''(\alpha'', \beta'')$  and  $U'(\mu, \nu, \kappa, \lambda)$  as indicated.

$$\mathbf{H}_{z1}^z = \mu_B B_z$$

|          | $\alpha''$ | $\beta''$ | $\mu$ | $\nu$ | $\kappa$ | $\lambda$ |
|----------|------------|-----------|-------|-------|----------|-----------|
| $M_s' =$ | 1/2        | -1/2      | 3/2   | 1/2   | -1/2     | -3/2      |

$$= \begin{bmatrix} -\frac{1}{3} - \frac{2}{3}k & 0 & 0 & -\frac{\sqrt{2}}{3}(2+k) & 0 & 0 \\ 0 & \frac{1}{3} + \frac{2}{3}k & 0 & 0 & 0 & 0 \\ 0 & 0 & 1-k & 0 & 0 & 0 \\ -\frac{\sqrt{2}}{3}(2+k) & 0 & 0 & \frac{1}{3} - \frac{1}{3}k & 0 & 0 \\ 0 & 0 & 0 & 0 & -\frac{1}{3} + \frac{1}{3}k & 0 \\ 0 & 0 & 0 & 0 & 0 & -1+k \end{bmatrix} \quad (\text{S.5})$$

The  $\text{Fe}^{\text{III}} [E''(\alpha'', \beta''), M_s' = \pm 1/2, U'(\mu, \nu, \kappa, \lambda); M_s' = \pm 3/2, \pm 1/2, ] - \text{Cu}^{\text{II}} [\alpha', \beta' (m_s = \pm 1/2)]$  pair states, can then easily be classified according to the total  $M_s = M_s' \pm m_s$  value. Using eq.S.4,  $\mathbf{H}$  can be reduced to a block diagonal form, and utilizing the  $C_{4v}$  symmetry, we arrive at the symmetry-adapted functions of the Fe-Cu pair states and the corresponding energy expressions:

$$\begin{aligned}
 M_s = \pm 2: \quad & E \quad \quad \quad U' \\
 & \begin{array}{l} M_s = +2 \quad \mu, \alpha' \\ M_s = -2 \quad \lambda, \beta' \end{array} \\
 & \mathbf{H}(E) = \frac{1}{2}\zeta - \frac{1}{4}J(^2E) \quad \quad \quad (S.6)
 \end{aligned}$$

$$\begin{aligned}
 M_s = \pm 1: \quad & E: \quad \quad \quad E'' \quad \quad \quad U' \quad \quad \quad U' \\
 & \begin{array}{l} +1 \quad \alpha''\alpha' \\ -1 \quad \beta''\beta' \end{array} \quad \quad \quad \begin{array}{l} \nu\alpha' \\ \kappa\beta' \end{array} \quad \quad \quad \begin{array}{l} \mu\beta' \\ \lambda\alpha' \end{array} \\
 & \mathbf{H}(E) = \begin{bmatrix} -\zeta + \frac{1}{6}J(^2E) - \frac{1}{12}J(^2B_2) & \pm \frac{1}{6\sqrt{2}}[J(^2E) + J(^2B_2)] & \pm \frac{1}{\sqrt{6}}J(^2E) \\ \pm \frac{1}{6\sqrt{2}}[J(^2E) + J(^2B_2)] & \frac{1}{2}\zeta + \frac{1}{12}J(^2E) - \frac{1}{6}J(^2B_2) & \frac{1}{2\sqrt{3}}J(^2E) \\ \pm \frac{1}{\sqrt{6}}J(^2E) & \frac{1}{2\sqrt{3}}J(^2E) & \frac{1}{2}\zeta + \frac{1}{4}J(^2E) \end{bmatrix} \quad (S.7)
 \end{aligned}$$

$$\begin{aligned}
 M_s = 0: \quad & B_1(E'') = \frac{1}{\sqrt{2}}(-\beta''\alpha' + \alpha''\beta') \quad B_1(U') = \frac{1}{\sqrt{2}}(\kappa\alpha' + \nu\beta') \\
 & \mathbf{H}(B_1) = \begin{bmatrix} -\zeta - \frac{1}{8}J(^2E) - \frac{1}{12}J(^2B_2) & \frac{1}{6\sqrt{2}}[-J(^2E) + J(^2B_2)] \\ \frac{1}{6\sqrt{2}}[-J(^2E) + J(^2B_2)] & \frac{1}{2}\zeta - \frac{1}{12}J(^2E) - \frac{1}{6}J(^2B_2) \end{bmatrix} \quad (S.8)
 \end{aligned}$$

$$\begin{aligned}
 & B_2(E'') = \frac{1}{\sqrt{2}}(\beta''\alpha' + \alpha''\beta') \quad B_2(U') = \frac{1}{\sqrt{2}}(\kappa\alpha' - \nu\beta') \\
 & \mathbf{H}(B_2) = \begin{bmatrix} -\zeta - \frac{1}{8}J(^2E) + \frac{1}{4}J(^2B_2) & \frac{1}{2\sqrt{2}}[J(^2E) + J(^2B_2)] \\ \frac{1}{2\sqrt{2}}[J(^2E) + J(^2B_2)] & \frac{1}{2}\zeta - \frac{1}{12}J(^2E) + \frac{1}{2}J(^2B_2) \end{bmatrix} \quad (S.9)
 \end{aligned}$$

As follows from (S.8) and (S.9), there is configuration mixing between the pair of states of lowest energy  $B_1(E'')$ ,  $B_2(E'')$  and  $B_1(U')$ ,  $B_2(U')$ . Using perturbation theory we obtain

eq.S.10-S.11 for the second order energy change, where exchange terms in the denominator have been neglected. With the values of  $J(^2E)=19$ ,  $J(^2B_2)=1.6$

$$\Delta E[B_1(\Gamma_7)] = -\frac{1}{108} \frac{[J(^2B_2) - J(^2E)]^2}{\zeta} \quad (\text{S.10})$$

$$\Delta E[B_2(\Gamma_7)] = -\frac{1}{12} \frac{[J(^2B_2) + J(^2E)]^2}{\zeta} \quad (\text{S.11})$$

and  $\zeta=345$  (all in  $\text{cm}^{-1}$ ) we obtain  $\Delta E[B_1(E'')] = -0.008 \text{ cm}^{-1}$  and  $\Delta E[B_2(E'')] = -0.106 \text{ cm}^{-1}$ , that is negligible influence on the ground state spin levels from the  $\text{Fe}^{\text{III}}(\text{U}') - \text{Cu}^{\text{II}}$  excited spin states.

The energies of the lowest four spin states, which arise from  $\text{Fe}^{\text{III}}(\text{E}'') - \text{Cu}^{\text{II}}$  exchange coupling, are given by (as derived in reference <sup>19</sup> in the manuscript and the Supporting Information <sup>1</sup>):

$$\mathbf{H}_{\text{Fe}(\Gamma_7)\text{Cu}} = \begin{array}{c} \begin{array}{cccc} \alpha''\alpha' & \beta''\alpha' & \alpha''\beta' & \beta''\beta' \end{array} \\ \left[ \begin{array}{cccc} \frac{1}{6}J(^2E) - \frac{1}{12}J(^2B_2) & 0 & 0 & -\frac{1}{3}\delta J(^2E) \\ 0 & -\frac{1}{6}J(^2E) + \frac{1}{12}J(^2B_2) & \frac{1}{6}J(^2B_2) & 0 \\ 0 & \frac{1}{6}J(^2B_2) & -\frac{1}{6}J(^2E) + \frac{1}{12}J(^2B_2) & 0 \\ -\frac{1}{3}\delta J(^2E) & 0 & 0 & \frac{1}{6}J(^2E) - \frac{1}{12}J(^2B_2) \end{array} \right] \end{array} \quad (\text{S.12})$$

with  $\delta J(^2E)$  to account for the possible decrease of symmetry  $\text{C}_{4v} \rightarrow \text{C}_{2v}$ :

$$\delta J(^2E) = \frac{J_{\xi\xi} - J_{\eta\eta}}{2} \quad (\text{S.13})$$

$$J(^2E) = \frac{J_{\xi\xi} + J_{\eta\eta}}{2} \quad (\text{S.14})$$

The parameters J, D and E in the spin Hamiltonian  $\hat{H}_{sph}$  (S.15, i.e. a simplified form of eq.4) are derived by comparing S.12 with the representation of  $\hat{H}_{sph}$  using the basis  $\alpha''\alpha'$ ,  $\beta''\alpha'$ ,  $\alpha''\beta'$ ,  $\beta''\beta'$ ;

$$\hat{H}_{sph} = -J\mathbf{s}_1'\mathbf{s}_2' + \frac{2D}{3}(2\mathbf{s}_{1z}'\mathbf{s}_{2z}' - \mathbf{s}_{1x}'\mathbf{s}_{2x}' - \mathbf{s}_{1y}'\mathbf{s}_{2y}') + 2E(\mathbf{s}_{1x}'\mathbf{s}_{2x}' - \mathbf{s}_{1y}'\mathbf{s}_{2y}') \quad (\text{S.15})$$

$$\mathbf{H}_{\text{sph}} = \begin{array}{c} \begin{array}{cccc} \alpha''\alpha' & \beta''\alpha' & \alpha''\beta' & \beta''\beta' \end{array} \\ \left[ \begin{array}{cccc} -\frac{1}{4}J + \frac{1}{3}D & 0 & 0 & E \\ 0 & \frac{1}{4}J - \frac{1}{3}D & -\frac{1}{2}J - \frac{1}{3}D & 0 \\ 0 & -\frac{1}{2}J - \frac{1}{3}D & \frac{1}{4}J - \frac{1}{3}D & 0 \\ E & 0 & 0 & -\frac{1}{4}J + \frac{1}{3}D \end{array} \right] \end{array} \quad (\text{S.16})$$

In going from (S.15) to (S.16) we make use of the following substitutions:

$$-\mathbf{s}'_1\mathbf{s}_2 \Rightarrow \begin{bmatrix} -\frac{1}{4} & 0 & 0 & 0 \\ 0 & \frac{1}{4} & -\frac{1}{2} & 0 \\ 0 & -\frac{1}{2} & \frac{1}{4} & 0 \\ 0 & 0 & 0 & -\frac{1}{4} \end{bmatrix}; \quad (\text{S.17})$$

$$2\mathbf{s}'_{1z}\mathbf{s}_{2z} - \mathbf{s}'_{1x}\mathbf{s}_{2x} - \mathbf{s}'_{1y}\mathbf{s}_{2y} \Rightarrow \begin{bmatrix} \frac{1}{2} & 0 & 0 & 0 \\ 0 & -\frac{1}{2} & -\frac{1}{2} & 0 \\ 0 & -\frac{1}{2} & -\frac{1}{2} & 0 \\ 0 & 0 & 0 & \frac{1}{2} \end{bmatrix} \quad (\text{S.18})$$

$$\mathbf{s}'_{1x}\mathbf{s}_{2x} - \mathbf{s}'_{1y}\mathbf{s}_{2y} = \begin{bmatrix} 0 & 0 & 0 & \frac{1}{2} \\ 0 & 0 & 0 & 0 \\ 0 & 0 & 0 & 0 \\ \frac{1}{2} & 0 & 0 & 0 \end{bmatrix} \quad (\text{S.19})$$

These can be derived, using the direct products  $\mathbf{s}_i \otimes \mathbf{s}_j$  (i,j=x,y,z) of the spinmatrices for s=1/2

$$\begin{matrix} \alpha & \beta & & \alpha & \beta & & \alpha & \beta \\ \mathbf{s}_x = \frac{1}{2} \begin{bmatrix} 0 & 1 \\ 1 & 0 \end{bmatrix}; & \mathbf{s}_y = \frac{i}{2} \begin{bmatrix} 0 & -1 \\ 1 & 0 \end{bmatrix}; & \mathbf{s}_z = \frac{1}{2} \begin{bmatrix} 1 & 0 \\ 0 & -1 \end{bmatrix}; \end{matrix} \quad (\text{S.20})$$

$$-\frac{1}{4}J + \frac{1}{3}D = \frac{1}{6}J(^2E) - \frac{1}{12}J(^2B_2) \quad (\text{S.21})$$

$$-\frac{1}{2}J - \frac{1}{3}D = \frac{1}{6}J(^2B_2) \quad (\text{S.22})$$

$$E = -\frac{1}{3}\delta J(^2E) \quad (\text{S.23})$$

From (S.21) and (S.22) result the expressions of J and D (eq.14).

Is it always possible to derive the parameters of the spin Hamiltonian from first principle calculations? There is a configuration mixing between the spin multiplets due to the  $E''$ - $\text{Cu}^{\text{II}}$  and the multiplets due to the  $U'$ - $\text{Cu}^{\text{II}}$  interaction via exchange coupling terms. In the discussed example,  $\zeta \gg J(^2E)$ ,  $J(^2B_2)$  and the parameters J,D and E (S.21-S.23) can be uniquely determined. However, starting from  $\text{Fe}^{\text{III}}\text{-CN-Cu}^{\text{II}}$  with a  $C_{4v}$  geometry and octahedral  $[\text{Fe}(\text{CN})_6]^{3-}$ , and introducing a  $D_{3d}$  Jahn-Teller distortion  $U'$  splits and starts to mix with  $E''$ . In Figure S.2, we plot the electronic energy levels of  $[\text{Fe}(\text{CN})_6]^{3-}$  in dependence of the ratio  $V_\tau Q_\tau / \zeta$  [obtained by diagonalization of the Hamiltonian S.3 with  $J(^2E)=J(^2B_2)=0$ ]. It follows, that the electronic ground state is well separated from the excited states both in  $O_h$  and in the distorted  $D_{3d}$  geometries. One can understand this result if one transforms the spin-orbit coupling matrix into the trigonal basis of eq.S.24.

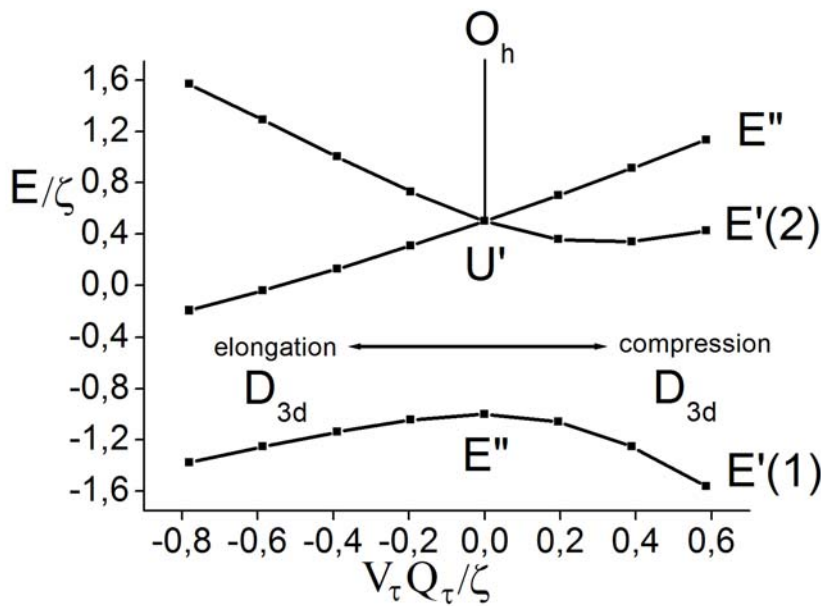

Figure S.2. Electronic levels of  $[\text{Fe}(\text{CN})_6]^{3-}$  in dependence of the vibronic coupling energy in units of  $\zeta$ .

In this basis,  $\mathbf{H}_{\text{JT}}$  is diagonal with the energies of  ${}^2A_1$  and  ${}^2E$ , given by  $-2V_\tau Q_\tau$  and  $V_\tau Q_\tau$ , respectively.

$$\begin{aligned}\varphi(A_1) &= \frac{1}{\sqrt{3}}(\xi + \eta + \zeta) \\ \varphi(E_y) &= \frac{1}{\sqrt{2}}(\xi - \eta) \\ \varphi(E_x) &= \frac{1}{\sqrt{6}}(-\xi - \eta + 2\zeta)\end{aligned}\tag{S.24}$$

While  ${}^2A_1$  is the ground state for trigonally compressed geometries, it is of  ${}^2E$  symmetry in elongated geometries. However the  ${}^2E$  term splits to first order by spin-orbit coupling with an energy difference between the ground state  $E'(1)$  and the  $E''$  lowest excited state given by  $\zeta$ . It is again much larger than  $J({}^2E)$  and  $J({}^2B_2)$ . Therefore, one can safely apply the spin-Hamiltonian (eq.4) and deduce its parameters by comparison with the eigenvalues of eq.(1) in the whole range of Jahn-Teller-distorted geometries between  $Q_\tau = -0.256$  and  $-0.256\text{\AA}$ . In the given example (Table 5,  $Q_\tau = 0.128\text{\AA}$  for Fe-Cu) one first diagonalizes  $\mathbf{H}_{\text{SO}} + \mathbf{H}_{\text{JT}}$ , including the Zeeman matrix with a small magnetic field ( $B_z = 0.0001\text{ T}$ ), providing the proper components  $\alpha''$  and  $\beta''$  of the

ground state Kramers doublet E'(1) (Figure S.2). With the resulting eigenvectors, one transforms the Hamiltonian (eq.S.3), yielding the following traceless matrix (with energies in cm<sup>-1</sup>) of the ground state spin levels:

$$\mathbf{H}_{\text{sph}} = \begin{array}{c} \begin{array}{cccc} \alpha''\alpha' & \beta''\alpha' & \alpha''\beta' & \beta''\beta' \end{array} \\ \left[ \begin{array}{cccc} 3.038 & 0.615 & 0.200(-1+i) & -2.933(1-i) \\ 0.615 & -3.038 & 0.020(-1+i) & 0.200(1-i) \\ 0.200(-1-i) & 0.020(-1-i) & -3.038 & -0.615 \\ -2.933(1+i) & 0.200(1+i) & -0.615 & 3.038 \end{array} \right] \end{array} \quad (\text{S.25})$$

One can show, using simple manipulations (as described e.g. by eq.S.15-S.20), that within the  $\alpha''\alpha'$ ,  $\beta''\alpha'$ ,  $\alpha''\beta'$  and  $\beta''\beta'$  basis, the spin-Hamiltonian of eq.4 leads to the matrix representation given by eq. S.26. From the comparison of S.25 and S.26 the spin-Hamiltonian parameters of Fe-Cu from Table 5 has been obtained (entry for  $Q_{\tau} = 0.128 \text{ \AA}$ ).

Finally, within the spin-only basis and without distortions on  $[\text{Fe}(\text{CN})_6]^{3-}$ , the Zeeman operator  $\hat{H}_{\text{ZI}}$  is represented by the matrices given in eq.S.27-S.29, showing directly the coupling of the local g-tensors of Fe<sup>III</sup> and Cu<sup>II</sup>.

$$\mathbf{H}_{\text{sph}} = \begin{array}{c} \begin{array}{cccc} \alpha''\alpha' & \beta''\alpha' & \alpha''\beta' & \beta''\beta' \end{array} \\ \left[ \begin{array}{cccc} \frac{1}{3}D - \frac{1}{4}J & \frac{1}{4}(D_{xz} - iD_{yz} - iA_x - A_y) & \frac{1}{4}(D_{xz} - iD_{yz} + iA_x + A_y) & E - \frac{1}{2}iD_{xy} \\ \frac{1}{4}(D_{xz} + iD_{yz} + iA_x - A_y) & -\frac{1}{3}D + \frac{1}{4}J & -\frac{1}{3}D - \frac{1}{2}J - \frac{i}{2}A_z & \frac{1}{4}(-D_{xz} + iD_{yz} - iA_x - A_y) \\ \frac{1}{4}(D_{xz} + iD_{yz} - iA_x + A_y) & -\frac{1}{3}D - \frac{1}{2}J + \frac{i}{2}A_z & -\frac{1}{3}D + \frac{1}{4}J & \frac{1}{4}(-D_{xz} + iD_{yz} + iA_x + A_y) \\ E + \frac{1}{2}iD_{xy} & \frac{1}{4}(-D_{xz} - iD_{yz} + iA_x - A_y) & \frac{1}{4}(-D_{xz} - iD_{yz} - iA_x + A_y) & \frac{1}{3}D - \frac{1}{4}J \end{array} \right] \end{array} \quad (\text{S.26})$$

$$\mathbf{H}_{\text{ZI}}^x = \mu_B B_x \begin{array}{c} \begin{array}{cccc} \alpha''\alpha' & \beta''\alpha' & \alpha''\beta' & \beta''\beta' \end{array} \\ \left[ \begin{array}{cccc} 0 & -\frac{1}{3} - \frac{2}{3}k & \frac{1}{2}g_{2x} & 0 \\ -\frac{1}{3} - \frac{2}{3}k & 0 & 0 & \frac{1}{2}g_{2x} \\ \frac{1}{2}g_{2x} & 0 & 0 & -\frac{1}{3} - \frac{2}{3}k \\ 0 & \frac{1}{2}g_{2x} & -\frac{1}{3} - \frac{2}{3}k & 0 \end{array} \right] \end{array} \quad (\text{S.27})$$

$$\mathbf{H}_{Z1}^y = \mu_B B_y \begin{array}{c} \begin{array}{cccc} \alpha''\alpha' & \beta''\alpha' & \alpha''\beta' & \beta''\beta' \end{array} \\ \left[ \begin{array}{cccc} 0 & \frac{i}{3} + \frac{2i}{3}k & -\frac{i}{2}g_{2y} & 0 \\ -\frac{i}{3} - \frac{2i}{3}k & 0 & 0 & -\frac{i}{2}g_{2y} \\ \frac{i}{2}g_{2y} & 0 & 0 & \frac{i}{3} + \frac{2i}{3}k \\ 0 & \frac{i}{2}g_{2y} & -\frac{i}{3} - \frac{2i}{3}k & 0 \end{array} \right] \end{array} \quad (\text{S.28})$$

$$\mathbf{H}_{Z1}^z = \mu_B B_z \begin{array}{c} \begin{array}{cccc} \alpha''\alpha' & \beta''\alpha' & \alpha''\beta' & \beta''\beta' \end{array} \\ \left[ \begin{array}{cccc} -\frac{1}{3} - \frac{2}{3}k + \frac{1}{2}g_{2z} & 0 & 0 & 0 \\ 0 & \frac{1}{3} + \frac{2}{3}k + \frac{1}{2}g_{2z} & 0 & 0 \\ 0 & 0 & -\frac{1}{3} - \frac{2}{3}k - \frac{1}{2}g_{2z} & 0 \\ 0 & 0 & 0 & \frac{1}{3} + \frac{2}{3}k - \frac{1}{2}g_{2z} \end{array} \right] \end{array} \quad (\text{S.29})$$

*The Hamiltonian and the z component of the Zeeman matrix for the  $\text{Fe}^{\text{III}}\text{-CN-Ni}^{\text{II}}$  Pair*

Applying consistently the same procedure as for the  $\text{Fe}^{\text{III}}\text{-Cu}^{\text{II}}$  pair, we have derived the matrix of the Hamiltonian (eq.1) which results from the spin coupling between  $[\text{Fe}(\text{CN})_6]^{3-}$  and the  $S=1$  ( $M_s=\pm 1, 0$ ) ground state of  $\text{Ni}^{\text{II}}$  for a binuclear unit with  $C_{4v}$  symmetry. Restricting to the manifold of the six spin states pertaining to the coupling of the  $[\text{Fe}(\text{CN})_6]^{3-}$  in its ground state  $E''$  and the  $S=1$  state of  $\text{Ni}^{\text{II}}$ , we list the energy matrix in eq. S.30 and the z component of the Zeeman matrix in eq.31. Exchange coupling parameters have already been specified for the  $\text{Fe}^{\text{III}}\text{-Cu}^{\text{II}}$  pair,  $D_{\text{Ni}}$  is the zero-field splitting parameter of  $\text{Ni}^{\text{II}}$ . We notice, that in the ground (excited)  $E''(1)$  [ $E''(2)$ ] spin states  $D_{\text{Ni}}$  is added (subtracted) from the diagonal energy term, thus leading to an increase (decrease) of the spin energy gap for negative (positive) values of  $D_{\text{Ni}}$ . Taking the difference between the diagonal matrix elements, i.e.  $E(\alpha'', 0; \beta'', 0) - E(\alpha'', -1; \beta'', 1)$  eq.18 is derived.

As in the case of the  $\text{Fe}^{\text{III}}\text{-Cu}^{\text{II}}$  pair, spin Hamiltonian theory is applicable for the  $\text{Fe}^{\text{III}}\text{-Ni}^{\text{II}}$  spin-cluster of a general  $C_s$  symmetry, and the parameters of eq.4 can be derived from a comparison between the (traceless) 6x6 energy matrix (eq.S.32,  $Q_\tau = 0.128 \text{ \AA}$ ) and the spin Hamiltonian, written in the parametric form of eq.S.33. Numerical values are listed in Table 5.

Finally g-tensor values of the  $\text{Fe}^{\text{III}}\text{-Cu}^{\text{II}}$  and  $\text{Fe}^{\text{III}}\text{-Ni}^{\text{II}}$  with bistable ground states listed in Table 9 have been calculated using a well documented procedure (reference <sup>87</sup> of the manuscript).

$$\mathbf{H} = \begin{array}{c} \begin{array}{ccccc} \alpha'',1 & \beta'',1 & \alpha'',0 & \beta'',0 & \alpha'',-1 & \beta'',-1 \end{array} \\ \left[ \begin{array}{cccccc} \frac{1}{3}J(^2E) - \frac{1}{6}J(^2B_2) + \frac{1}{3}D_{Ni} & 0 & 0 & -\frac{\sqrt{2}}{3}\delta J(^2E) & 0 & 0 \\ 0 & -\frac{1}{3}J(^2E) + \frac{1}{6}J(^2B_2) + \frac{1}{3}D_{Ni} & \frac{1}{3\sqrt{2}}J(^2B_2) & 0 & 0 & 0 \\ 0 & \frac{1}{3\sqrt{2}}J(^2B_2) & -\frac{2}{3}D_{Ni} & 0 & 0 & -\frac{\sqrt{2}}{3}\delta J(^2E) \\ -\frac{\sqrt{2}}{3}\delta J(^2E) & 0 & 0 & -\frac{2}{3}D_{Ni} & \frac{1}{3\sqrt{2}}J(^2B_2) & 0 \\ 0 & 0 & 0 & \frac{1}{3\sqrt{2}}J(^2B_2) & -\frac{1}{3}J(^2E) + \frac{1}{6}J(^2B_2) + \frac{1}{3}D_{Ni} & 0 \\ 0 & 0 & -\frac{\sqrt{2}}{3}\delta J(^2E) & 0 & 0 & \frac{1}{3}J(^2E) - \frac{1}{6}J(^2B_2) + \frac{1}{3}D_{Ni} \end{array} \right] \quad (\text{S.30})
\end{array}$$

$$\mathbf{H}_{Z1}^z = \begin{array}{c} \begin{array}{ccccc} \alpha'',1 & \beta'',1 & \alpha'',0 & \beta'',0 & \alpha'',-1 & \beta'',-1 \end{array} \\ \left[ \begin{array}{cccccc} -\frac{1}{3} - \frac{2}{3}k + g_{z2} & 0 & 0 & 0 & 0 & 0 \\ 0 & \frac{1}{3} + \frac{2}{3}k + g_{z2} & 0 & 0 & 0 & 0 \\ 0 & 0 & -\frac{1}{3} - \frac{2}{3}k & 0 & 0 & 0 \\ 0 & 0 & 0 & \frac{1}{3} + \frac{2}{3}k & 0 & 0 \\ 0 & 0 & 0 & 0 & -\frac{1}{3} - \frac{2}{3}k - g_{z2} & 0 \\ 0 & 0 & 0 & 0 & 0 & \frac{1}{3} + \frac{2}{3}k - g_{z2} \end{array} \right] \quad (\text{S.31})
\end{array}$$

$$\mathbf{H}_{\text{sph}} = \begin{matrix} & \alpha'',1 & \beta'',1 & \alpha'',0 & \beta'',0 & \alpha'',-1 & \beta'',-1 \\ \begin{bmatrix} 4.039 & 0.995 & 0.0995(-1+i) & -2.669(1-i) & 0 & 0 \\ 0.995 & -4.039 & -0.107(1-i) & 0.0995(1-i) & 0 & 0 \\ 0.0995(-1-i) & -0.107(1+i) & 0 & 0 & -0.0995(1-i) & -2.669(1-i) \\ -2.669(1+i) & 0.0995(1+i) & 0 & 0 & -0.107(1-i) & 0.0995(1-i) \\ 0 & 0 & -0.0995(1+i) & -0.107(1+i) & -4.039 & -0.995 \\ 0 & 0 & -2.669(1+i) & 0.0995(1+i) & -0.995 & 4.039 \end{bmatrix} \end{matrix} \quad (\text{S.32})$$

$$\mathbf{H}_{\text{sph}} = \begin{matrix} & \alpha'',1 & \beta'',1 & \alpha'',0 & \beta'',0 & \alpha'',-1 & \beta'',-1 \\ \begin{bmatrix} \frac{2}{3}D - \frac{1}{2}J & \frac{1}{2}(D_{xz} - iD_{yz} - iA_x - A_y) & \frac{1}{2\sqrt{2}}(D_{xz} - iD_{yz} + iA_x + A_y) & \sqrt{2}E - \frac{i}{\sqrt{2}}D_{xy} & 0 & 0 \\ \frac{1}{2}(D_{xz} + iD_{yz} + iA_x - A_y) & -\frac{2}{3}D + \frac{1}{2}J & -\frac{\sqrt{2}}{3}D - \frac{1}{\sqrt{2}}J - \frac{i}{\sqrt{2}}A_z & \frac{1}{2\sqrt{2}}(-D_{xz} + iD_{yz} - iA_x - A_y) & 0 & 0 \\ \frac{1}{2\sqrt{2}}(D_{xz} + iD_{yz} - iA_x + A_y) & -\frac{\sqrt{2}}{3}D - \frac{1}{\sqrt{2}}J + \frac{i}{\sqrt{2}}A_z & 0 & 0 & \frac{1}{2\sqrt{2}}(D_{xz} - iD_{yz} + iA_x + A_y) & \sqrt{2}E - \frac{i}{\sqrt{2}}D_{xy} \\ \sqrt{2}E + \frac{i}{\sqrt{2}}D_{xy} & \frac{1}{2\sqrt{2}}(-D_{xz} - iD_{yz} + iA_x - A_y) & 0 & 0 & -\frac{\sqrt{2}}{3}D - \frac{1}{\sqrt{2}}J - \frac{i}{\sqrt{2}}A_z & \frac{1}{2\sqrt{2}}(-D_{xz} + iD_{yz} - iA_x - A_y) \\ 0 & 0 & \frac{1}{2\sqrt{2}}(D_{xz} + iD_{yz} - iA_x + A_y) & -\frac{\sqrt{2}}{3}D - \frac{1}{\sqrt{2}}J + \frac{i}{\sqrt{2}}A_z & -\frac{2}{3}D + \frac{1}{2}J & \frac{1}{2}(-D_{xz} + iD_{yz} + iA_x + A_y) \\ 0 & 0 & \sqrt{2}E + \frac{i}{\sqrt{2}}D_{xy} & \frac{1}{2\sqrt{2}}(-D_{xz} - iD_{yz} + iA_x - A_y) & \frac{1}{2}(-D_{xz} - iD_{yz} - iA_x + A_y) & \frac{2}{3}D - \frac{1}{2}J \end{bmatrix} \end{matrix} \quad (\text{S.33})$$

### Dynamic Jahn-Teller Coupling

Since the  $\text{Fe}^{\text{III}}\text{-CN}$  bond is stronger than the  $\text{Cu}^{\text{II}}\text{-NC}$  and  $\text{Ni}^{\text{II}}\text{-NC}$  bonds, we can restrict vibronic coupling to the  $[\text{Fe}(\text{CN})_6]^{3-}$  unit and consider only the  $\tau_{2g}$  mode for its vibronic levels. One can readily extend eq.1 with the nuclear kinetic and potential energy operators (eq.S.34);  $\hbar\omega_\tau$  is the energy of the three-dimensional harmonic oscillator

$$\hat{H}_{\text{vib}} = \frac{1}{2}\hbar\omega_\tau(\hat{P}_\xi^2 + \hat{P}_\eta^2 + \hat{P}_\zeta^2 + Q_\xi'^2 + Q_\eta'^2 + Q_\zeta'^2) \quad (\text{S.34})$$

( $93 \text{ cm}^{-1}$  for  $[\text{Fe}(\text{CN})_6]^{3- 21}$ );  $\hat{P}_i$  and  $Q_i$  are dimensionless operators related to the observables for momentum and position and given by eq.S.35. The vibronic eigenfunctions  $\Psi$  of the total

$$\hat{P}_i = \frac{1}{\sqrt{\mu\hbar\omega}}\hat{p}_i; Q_i' = \sqrt{\frac{\mu\omega}{\hbar}}Q_i; i = \xi, \eta, \zeta \quad (\text{S.35})$$

Hamiltonian  $\hat{H} + \hat{H}_{\text{vib}}$  are expressed as a linear combination of products of the spin-orbital basis functions  $\phi_i$  of  $\hat{H}$  and the eigenstates of the states of  $\hat{H}_{\text{vib}}$  (the three-dimensional harmonic oscillator functions  $\chi_j(Q_\xi')\chi_k(Q_\eta')\chi_l(Q_\zeta')$ ) up to the level  $n_v$ :

$$\Psi = \sum_{i=1}^6 \sum_j \sum_k \sum_l \sum_{j+k+l=0}^{n_v} c_{ijkl} \phi_i \chi_j(Q_\xi') \chi_k(Q_\eta') \chi_l(Q_\zeta') \quad (\text{S.36})$$

The total basis size  $N_v$  without exploitation of the vibronic symmetries is given by eq.S.37,

$$N_v = n_M 6 \left[ \frac{n_v(n_v^2 + 6n_v + 11)}{6} + 1 \right] \quad (\text{S.37})$$

where  $n_M$  is the spin-degeneracy of  $\text{Cu}^{\text{II}}$  ( $n_M=2$ ) or  $\text{Ni}^{\text{II}}$  ( $n_M=3$ ). For the moderate vibronic coupling strength obtained in  $[\text{Fe}(\text{CN})_6]^{3-}$  good accuracy (equal or better than 2%) for the calculated lowest 4 or 6 spin states for  $\text{Fe}^{\text{III}}\text{-Cu}^{\text{II}}$  and  $\text{Fe}^{\text{III}}\text{-Ni}^{\text{II}}$ , respectively, and for the  $\mathbf{g}$ -tensor has been achieved with  $n_v=6$ , leading to a total dimension of the vibronic matrix of  $1008 \times 1008$  and  $1512 \times 1512$ , respectively.

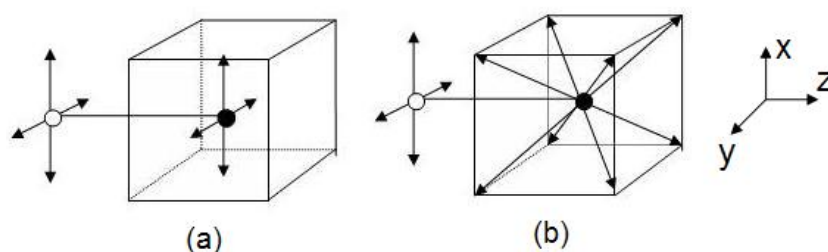

Fig.S.3. (a) The  $\text{Fe}^{\text{III}}\text{-M}^{\text{II}}$  ( $\text{M}^{\text{II}}=\text{Cu}^{\text{II}}, \text{Ni}^{\text{II}}$ ; white,  $\text{Fe}^{\text{III}}$ : black) pair with a linear  $\text{Fe}^{\text{III}}\text{-CN-M}^{\text{II}}$  ( $C_{4v}$ ) bridge and a regular  $[\text{Fe}(\text{CN})_6]^{3-}$  center; the arrows indicate the directions for optimal  $\pi$ -overlap between the singly occupied  $t_{2g}$  ( $d_{xz}, d_{yz}$ ) orbitals of  $\text{Fe}^{\text{III}}$  ( $t_{2g}^5$ ) and the fully occupied  $d_{xz}, d_{yz}$  orbitals of  $\text{Cu}^{\text{II}}$  ( $\text{Ni}^{\text{II}}$ ). (b) The  $\text{Fe}^{\text{III}}\text{-M}^{\text{II}}$  ( $\text{M}^{\text{II}}=\text{Cu}^{\text{II}}, \text{Ni}^{\text{II}}$ ) pair with a trigonally distorted  $[\text{Fe}(\text{CN})_6]^{3-}$  center and a  ${}^2A_{1g}$  ( $d_{z^2}, D_{3d}$ ) ground state with  $d_{z^2}$  lobes pointing towards the body diagonals of a cube with four different (but equivalent) geometries (minima of the ground state potential energy surface, misalignment of the singly occupied  $d_{z^2}$  orbital of  $[\text{Fe}(\text{CN})_6]^{3-}$  and the  $\pi$  ( $d_{xz}, d_{yz}$ ) orbitals of  $\text{Cu}^{\text{II}}$  ( $\text{Ni}^{\text{II}}$ )).

*Effect of the DFT functional on the exchange parameters  $J(B_2)[Fe^{III}(e_g^4 b_{2g}^1)-Cu^{II}]$  and  $J(E)[Fe^{III}(e_g^3 b_{2g}^2)-Cu^{II}]$  and further on the spin-levels and the magnetic anisotropy on  $Fe^{III}-CN-Cu^{II}$  exchange pairs without ( $C_{4v}$ ) and with ( $C_s$ ) Jahn-Teller distortions of  $\tau_{2g}$  type.*

Table S.1. The exchange coupling energy ( $J$ , in  $cm^{-1}$ ,  $H_{ex}=-JS_1S_2$ ) for the exchange pair  $Fe^{III}-CN-Cu^{II}(d_{z2})$  from DFT broken spin DFT calculations with (SP) and without (SUP) spin-projection, in dependence of the adopted functional and the electronic configuration of  $Fe^{III}$ , in comparison with the value deduced from magnetic data.

| electronic configuration of $[Fe(CN)_6]^{3-}$ | J           | VWN   | PW91  | PBE   | OPBE   | B3LYP 20%HF | B1LYP 25%HF | B3LYP* 15%HF | Exp.                   |
|-----------------------------------------------|-------------|-------|-------|-------|--------|-------------|-------------|--------------|------------------------|
| $b_2^1 e^4$                                   | $J_{SP}^a$  | -45.2 | -67.7 | -69.2 | -112.9 | -6.4        | 1.6         | -16.2        | 17.0 <sup>c</sup>      |
|                                               | $J_{SUP}^b$ | -22.6 | -33.9 | -34.7 | -56.5  | -3.2        | 0.8         | -8.1         | 13.8; 3.9 <sup>d</sup> |
| $b_2^2 e^3$                                   | $J_{SP}^a$  | 114.6 | 95.2  | 95.2  | 103.2  | 27.4        | 19.4        | 35.5         | 20.9 <sup>e</sup>      |
|                                               | $J_{SUP}^b$ | 57.3  | 47.6  | 47.6  | 51.6   | 13.7        | 9.7         | 17.7         | 5.0 <sup>f</sup>       |

<sup>a</sup> Calculated with the spin-projected formula:  $J_{SP}=(E_{BS}-E_{HS})/(2S_1S_2)$ ;  $E_{BS}$  and  $E_{HS}$  are the energies of the ( $\uparrow\downarrow$ ) broken-spin and the ( $\uparrow\uparrow$ ) high-spin Slater determinants.

<sup>b</sup> Calculated with the spin-unprojected formula:  $J_{SUP}=(E_{BS}-E_{HS})/(2S_1S_2+S_2)$ ,  $S_2 \leq S_1$ ;

<sup>c</sup> Reported from a fit to magnetic susceptibility data of the  $Cu_3Fe_2$  SMM with a  $d_{x^2-y^2}$  ground state of  $Cu^{II}$ ; to compare with the calculated numbers ( $d_{z2}$  ground state of  $Cu^{II}$ ), the experimental energy has to be multiplied by  $2/\sqrt{3}$  ( $J_{d_{z2}}=2/\sqrt{3}J_{d_{x^2-y^2}}$ ).

<sup>d</sup> Reported for the two distinct  $Fe^{III}-CN-Cu^{II}$  exchange coupled pairs in the  $Fe^{III}_2Cu^{II}_3$  complex

$[ \{ Cu(rac-CTH) \}_3 \{ Fe(CN)_6 \}_2 ] \cdot 2H_2O$ ,  $rac-CTH = rac-5,7,7,12,14,14$ -hexamethyl-1,4,8,11-tetraazacyclotetradecane from simulations using a Heisenberg Hamiltonian.<sup>19</sup>

<sup>e</sup> Reported from Monte Carlo simulations of the magnetic properties of heterobimetallic chain

$\{ [Fe^{III}(bpym)(CN)_4]_2 M^{II}(H_2O)_2 \} \cdot 6H_2O$ ,  $bpym=2,2'$ -bipyrimidine using an isotropic Heisenberg model.<sup>20</sup>

<sup>f</sup> reported from a fit of the isotropic  $J$  to magnetic susceptibility data on the bimetallic complex

$[ \{ Fe^{III}(phen)(CN)_4 \}_2 Cu^{II}(H_2O)_2 ] \cdot 4H_2O$ .<sup>21</sup>

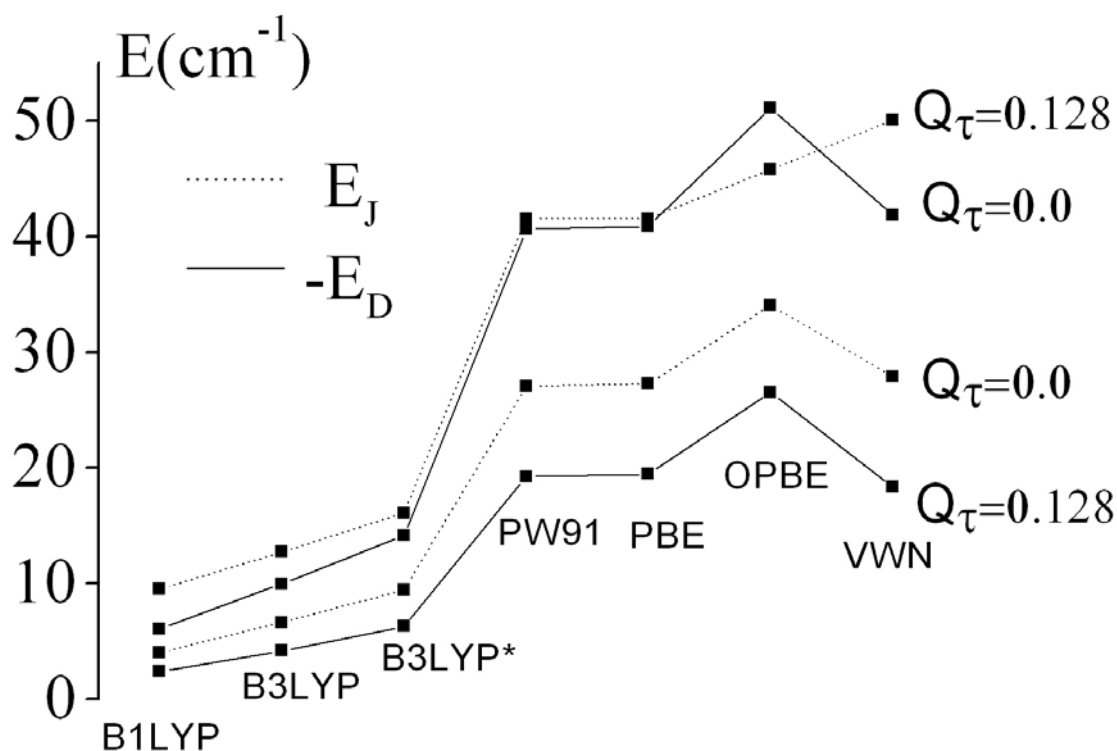

Fig.S.4. Effect of the functional on the  $E_J$  and  $-E_D$  parameters.

### Footnote

<sup>1</sup> Matrix S.12 differs in sign compared to the one given in manuscript reference <sup>22</sup> (and derived in detail the Supporting information there). This is because real spins rather than effective spins of  $\text{Fe}^{\text{III}}$  have been employed in the cited work (implying  $\mathbf{g}$  tensors of  $\text{Fe}^{\text{III}}$  and  $\text{Cu}^{\text{II}}$  which are of the same sign). This has lead to the conventional negative D and a positive J values. Here we should stress, this is only possible if  $J(^2B_2)=0$ , in which case  $B_1$  and  $B_2$  (Figure 3) become accidentally degenerate. In a consistent description however, one should keep to the definitions and sign conventions of manuscript reference reference <sup>93</sup> which allows also to provide a correct symmetry description.
